# Supplementary material
Source: PubMed Central journal article supplement (PMC2770020)
Supplement: supp_109.078139_biolreprod.109.078139-1.pdf [file supp_109.078139_biolreprod.109.078139-1.pdf]

Bischoff et al., Supplemental Table S1a. Primers utilized to generate the semi-quantitative RT-PCR results.

| Primer Name             | *Primer Nr. | Sequence                                           |
|-------------------------|-------------|----------------------------------------------------|
| <i>DIRAS3 Ex3-4-F</i>   | 2586        | 5'-ACGATCACCGTAGGCAGAGG-3'                         |
| <i>DIRAS3 Ex3-4-R</i>   | 2589        | 5'-GGAGTTTGGTTACGCAATTTGTT-3'                      |
| <i>IGF2-EX9-R</i>       | 2422        | 5'-GCGGACTGCTTCCAGGTGTCATAGC-3'                    |
| <i>IGF2-P1-EX1-F</i>    | 2424        | 5'-GGATGAGTGGCGAGCTGTC-3'                          |
| <i>IGF2-P1-F</i>        | 329         | 5'-GGTAGGCGGCTGGGATGAGTGG-3'                       |
| <i>IGF2-P1-R</i>        | 330         | 5'-TGCCGGCCTGCTGAAGTAGAAG-3'                       |
| <i>IGF2-P2-EX4-F</i>    | 2425        | 5'-CCTCGGACTTGGGAACTGTC-3'                         |
| <i>IGF2-P2-F</i>        | 331         | 5'-TCCCTGGGTCTTCCAACGGACTGGGCGT-3'                 |
| <i>IGF2-P2-R</i>        | 332         | 5'-CTCACTGGGGCGGTAAGCAGCATAGCAG-3'                 |
| <i>IGF2-P3-EX5-F</i>    | 2426        | 5'-CCCGTTTCACGTTCACTCTG-3'                         |
| <i>IGF2-P3-F</i>        | 333         | 5'-CGGCCCGTCTCCCAACAATCAGAC-3'                     |
| <i>IGF2-P3-R</i>        | 334         | 5'-GGGCGGTAAGCAGCATAGCAGCACGAG-3'                  |
| <i>IGF2-P4-EX6-F</i>    | 2427        | 5'-TGGACATTAGCTTCTCCTCTGA-3'                       |
| <i>IGF2-P4-F</i>        | 335         | 5'-GGCAGGCTCCAGCTTCTCCTCCTCC-3'                    |
| <i>IGF2-P4-R</i>        | 336         | 5'-GGGCGGACTGCTTCCAGGTGTCATAGC-3'                  |
| <i>INPP5F_V1 + V2-F</i> | 1526        | 5'-TCGGCCCTACATTCTCTAAAGAGT-3'                     |
| <i>INPP5_V1 + V2-R</i>  | 1527        | 5'-CCACTCCGATGAATTCCTTACA-3'                       |
| <i>INPP5F_V2-F</i>      | 2466        | 5'-ACTGCCTGTTATGTGCCAAG-3'                         |
| <i>INPP5F_V2-R</i>      | 2467        | 5'-GGCCACGTAGTAGGCAGAGTT-3'                        |
| <i>PEG10-F</i>          | 355         | 5'-GATCGATCGTCTTCGACTCTGA-3'                       |
| <i>PEG10-R</i>          | 356         | 5'-GAATGACGGTTGTGCTGGTG-3'                         |
| <i>PEG3-F</i>           | 1063        | 5'-GTGACGTACTAGCAACG GGTACCGGTAATGGCTCACATGCAG-3'  |
| <i>PEG3-R</i>           | 1064        | 5'-TAGCAGGATACGACTATC GTGTGGCAACCACTAAATCTGGGGT-3' |
| <i>PLAGL1 EX1-F</i>     | 2559        | 5'-CACGGCATCTGCCATTTGT-3'                          |
| <i>PLAGL1 EX2-R</i>     | 2560        | 5'-CCACATCAGACGTGAGAGCA-3'                         |
| <i>PLAGL1- EX3-F</i>    | 325         | 5'-GCAAGATCTCTTCTTACGGTTTGA-3'                     |
| <i>PLAGL1- EX4/5-R</i>  | 326         | 5'-GCAATCTGCATCACCAGAGC-3'                         |
| <i>PLAGL1- EX4-F</i>    | 761         | 5'-GTGACGTACTAGCAACG TTGCCTCTGCAAGAGCCTCA-3'       |
| <i>PLAGL1- EX7-R</i>    | 762         | 5'-TAGCAGGATACGACTATCCAGGTAGCTCCTTGGGCAGGT-3'      |
| <i>PLAGL1- EX8-R</i>    | 2563        | 5'-AACTAACTACATCCAACCCTGAA-3'                      |
| <i>PPP1R9A-F</i>        | 1567        | 5'-CCTGATACTGGCTTTGGGTCTC-3'                       |
| <i>PPP1R9A-R</i>        | 1568        | 5'-CTCAAACGTTATGCCACACAGTG-3'                      |
| <i>RPL18-F</i>          | 2454        | 5'-CAAGGACCGAAAGGTTTCGAC-3'                        |
| <i>RPL18-R</i>          | 2455        | 5'-GCCCTTGGAGCGAACATAGG-3'                         |
| <i>SGCE-EX11-R</i>      | 1714        | 5'-GTGACGTACTAGCAACG ATGTCAGAAAAGCTCATGCATTAC-3'   |
| <i>SGCE-EX7-F</i>       | 353         | 5'-GGAAGCGTGGAAAAGAGAA-3'                          |
| <i>SGCE-EX9-R</i>       | 354         | 5'-CGGAGTCTTTGGTAGATTTCTG-3'                       |
| <i>SLC38A4 EX11-F</i>   | 2464        | 5'-CCCAGAGGAAGATGCAAACA-3'                         |
| <i>SLC38A4 EX11-R</i>   | 2463        | 5'-GGGCAGCAAGCAGGTACATA-3'                         |
| <i>SLC38A4 EX11-R</i>   | 2465        | 5'-TGACCTAGTGAGTGAAGGCAAA-3'                       |
| <i>SLC38A4 EX13-R</i>   | 2461        | 5'-CCCAAGCCTCCAGATTTGAC-3'                         |
| <i>SLC38A4 EX1-F</i>    | 2460        | 5'-TCCCATGGAAGTGAAGCAATG-3'                        |
| <i>SLC38A4 EX9-F</i>    | 2462        | 5'-AGGCCAAGGGCTCTCTCAC-3'                          |
| <i>SLC38A4-3'UTR-F</i>  | 1173        | 5'-TTTCTGGACTTTGCTCCTT-3'                          |
| <i>SLC38A4-3'UTR-R</i>  | 1172        | 5'-GCCTCCCAATACATTGAACCAT-3'                       |
| <i>SNRPN-F</i>          | 1179        | 5'-TTGAGATTGTCCAGAATAGCCC-3'                       |
| <i>SNRPN-R</i>          | 1180        | 5'-TAAGCAATACTCAGGGAAGAGG-3'                       |

\*Primer Nr= Code used to facilitate information and resource sharing.

F=Forward primer.

R=Reverse primer.

Bischoff et al., Supplemental Table S1b. Primers used for quantification of allele-specific expression by pyrosequencing (QUASEP).

| Primer Name          | *Primer Nr. | Sequence                                           |
|----------------------|-------------|----------------------------------------------------|
| <i>ASB4-F</i>        | 1057        | 5'- GTGACGTACTAGCAACGTGGATAGCAGCACAGCCATT -3'      |
| <i>ASB4-R</i>        | 1058        | 5'- TAGCAGGATACGACTATC TCACCTCATCTGCCGTATGC -3'    |
| <i>ASB4-sPSQ-1</i>   | 1061        | 5'- TCCACGAGGTTGGCT -3'                            |
| <i>ASB4-sPSQ-2</i>   | 1707        | 5'- TGCTGGAAGCTGGCG -3'                            |
| <i>CD81-F</i>        | 2604        | 5'- GTGACGTACTAGCAACG GAGGACTGCCACAGCAAG -3'       |
| <i>CD81-R</i>        | 2605        | 5'- TAGCAGGATACGACTATC ATCACAGCGACCACAATGG -3'     |
| <i>CD81-sPSQ</i>     | 2606        | 5'- GGACTGCCACAGCAAGATTG -3'                       |
| <i>DCN-F</i>         | 648         | 5'- GTGACGTACTAGCAACG-AGGTTCTTGGTGGGAGAAT -3'      |
| <i>DCN-F2</i>        | 650         | 5'- TGACGTACTAGCAACG- AGGTTCTTGGTGGGAGAAT -3'      |
| <i>DCN-R</i>         | 649         | 5'- TAGCAGGATACGACTATC-CAACTCGAAGATGGCATTGA -3'    |
| <i>DCN-R2</i>        | 651         | 5'- TAGCAGGATACGACTATC-CTCGAAGATGGCATTGACAG -3'    |
| <i>DCN-sPSQ-1</i>    | 652         | 5'- GGTCCCAGAGGCTCTAA -3'                          |
| <i>DCN-sPSQ-2</i>    | 653         | 5'-CTATCATCTTCTCTTGCT-3'                           |
| <i>DIRAS-F</i>       | 2586        | 5'- GTGACGTACTAGCAACG ACGATCACCGTAGGCAGAGG -3'     |
| <i>DIRAS-R</i>       | 2587        | 5'- TAGCAGGATACGACTATC GGTTCCCATCTCGGAAAGAG -3'    |
| <i>DIRAS-sPSQ</i>    | 2588        | 5'- CGCCTGATGAAGCGGCT -3'                          |
| <i>DLK1-F</i>        | 1731        | 5'- GTGACGTACTAGCAACG CCGGCTTCATGGACAAGA -3'       |
| <i>DLK1-R</i>        | 1732        | 5'- TAGCAGGATACGACTATC AGCGGAGTGCTCTTGGTG -3'      |
| <i>DLK1-sPSQ</i>     | 1733        | 5'- TGCAGGCAGGTGCCC -3'                            |
| <i>H19-F</i>         | 963         | 5'- GTGACGTACTAGCAACGGCATTTCATCCCGGTCAATT -3'      |
| <i>H19-F2</i>        | 966         | 5'- GTGACGTACTAGCAACGCTATAGGCAGGGCAACATCGG -3'     |
| <i>H19-R</i>         | 964         | 5'- TAGCAGGATACGACTATCTGCAGGAGGCCAGAGAAACA -3'     |
| <i>H19-R2</i>        | 967         | 5'- TAGCAGGATACGACTATCTGCAGGAGGCCAGAGAAACA -3'     |
| <i>H19-sPSQ-1</i>    | 965         | 5'- TGGTGGTCAGGGGGA -3'                            |
| <i>H19-sPSQ-2</i>    | 968         | 5'- GCGAACCTCTCTCCA -3'                            |
| <i>IGF2AS-F</i>      | 1545        | 5'- GTGACGTACTAGCAACG GGCACCAACCCTGGAGAAG -3'      |
| <i>IGF2AS-R</i>      | 1546        | 5'- TAGCAGGATACGACTATC GTCCAGGCGCATGTCCAA -3'      |
| <i>IGF2AS-sPSQ-1</i> | 1547        | 5'- CATGTCCAAGCACCA -3'                            |
| <i>IGF2AS-sPSQ-2</i> | 1548        | 5'- CAACCCTGGAGAAGCTTCT -3'                        |
| <i>MEST-F</i>        | 1721        | 5'- GTGACGTACTAGCAACG TGCTGTCACCCATCCTCACAC -3'    |
| <i>MEST-R</i>        | 1722        | 5'- TAGCAGGATACGACTATC ATGTCCCACAGCTCACTCTCAG -3'  |
| <i>MEST-sPSQ</i>     | 1723        | 5'- ACCCCAGTCTTTGGGC -3'                           |
| <i>NNAT-F</i>        | 971         | 5'- GTGACGTACTAGCAACGAATCTTGGTGCAGCAGACAAGT -3'    |
| <i>NNAT-F2</i>       | 973         | 5'- GTGACGTACTAGCAACGAGTCACAACCTGCGTGCCTGT -3'     |
| <i>NNAT-R</i>        | 972         | 5'- TAGCAGGATACGACTATC GACCACAATTGCGTGAGACC -3'    |
| <i>NNAT-R2</i>       | 974         | 5'- TAGCAGGATACGACTATC TTTCTTTTGGGTGGGAGTGG -3'    |
| <i>NNAT-sPSQ</i>     | 920         | 5'-TTGCTCCTTCAATTCC-3'                             |
| <i>PEG10-F</i>       | 404         | 5'- Biotin -TTGCACAGGATCTGGATTGG -3'               |
| <i>PEG10-R</i>       | 386         | 5'- CTGGTGGTGGTTGCTGACAT -3'                       |
| <i>PEG10-sPSQ</i>    | 387         | 5'- CATGAGGCATCACCA -3'                            |
| <i>PLAGL1-F</i>      | 388         | 5'- GCCTCTGCAAGAGCCTCAGT -3'                       |
| <i>PLAGL1-R</i>      | 405         | 5'- Biotin -AGGTAGCTCCTTGGGCAGGT -3'               |
| <i>PLAGL1-sPSQ</i>   | 390         | 5'- GCTCAACCCAGTTT -3'                             |
| <i>SGCE-F 1</i>      | 1714        | 5'- GTGACGTACTAGCAACG ATGTCAGAAAAGCTCATGCATTAC -3' |
| <i>SGCE-F2</i>       | 2504        | 5'- GTGACGTACTAGCAACG GGAAC TTGCCACACCAGAC -3'     |
| <i>SGCE-F3</i>       | 2506        | 5'- GTGACGTACTAGCAACG CCTAGGAACTTGCCACACCA -3'     |
| <i>SGCE-R1</i>       | 1715        | 5'- TAGCAGGATACGACTATC AGAACTTGCCACACCAGACTCA -3'  |
| <i>SGCE-R2</i>       | 2505        | 5'- TAGCAGGATACGACTATC GCTTTGCCCTTACTTGGTGAAGA -3' |

|                     |      |                                                            |
|---------------------|------|------------------------------------------------------------|
| SGCE-R3             | 2507 | 5'- TAGCAGGATACGACTATC GATTATTACTTTTCAGTACTCACCTGTAGTC -3' |
| SGCE-sPSQ           | 1716 | 5'- CCATTTACCTGTAGTCTGC -3'                                |
| SNORD107-F          | 1398 | 5'- GTGACGTACTAGCAACG ACAGTATTTTCATTCCCGATGC -3'           |
| SNORD107-R          | 1399 | 5'- TAGCAGGATACGACTATC TCCCTTGGAATATTAATGTCTGTG -3'        |
| SNORD107-sPSQ       | 1400 | 5'- GATGCATGACAAATGG -3'                                   |
| USF Aydin           | 645  | 5'-GTG ACG TAC TAG CAA CG-3'                               |
| USF Aydin Biotin-1  | 643  | 5'-Biotin- GTGACGTACTAGCAACG-3'                            |
| USR Aydin1          | 646  | 5'-TAG CAG GAT ACG ACT ATC-3'                              |
| USR Aydin1 Biotin-2 | 644  | 5'-Biotin- TAGCAGGATACGACTATC-3'                           |

---

\*Primer Nr= Code used to facilitate information and resource sharing.

F=Forward primer.

R=Reverse primer.

sPSQ=sequencing primer.

US= universal sequencing.
