# Supplementary material
Source: PubMed Central journal article supplement (PMC2770020)
Supplement: supp_109.078139_biolreprod.109.078139-2.pdf [file supp_109.078139_biolreprod.109.078139-2.pdf]

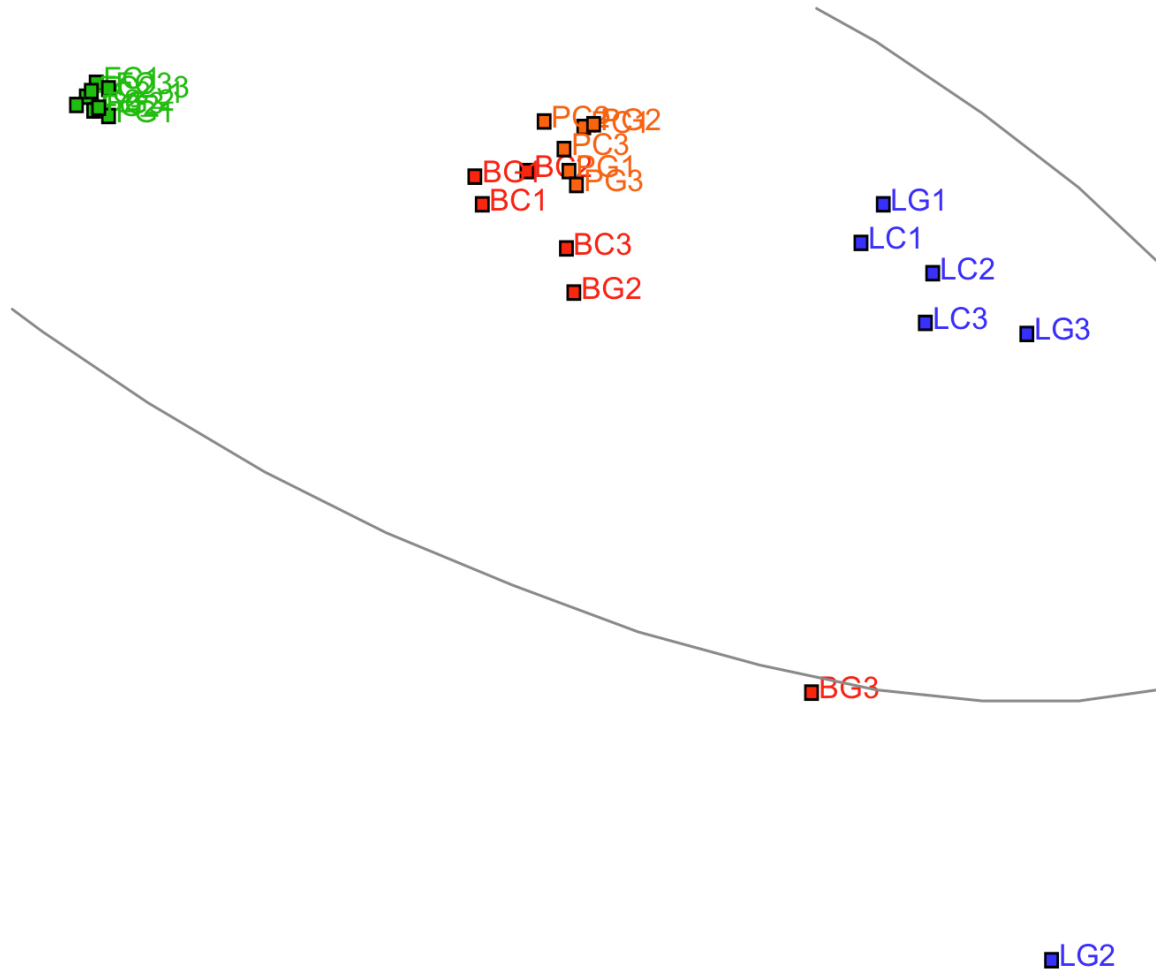

FIG1S. Principal Component Analysis (PCA) of array results. All arrays were analyzed for outliers using principal components analysis as described in text. The first three principal components were used as they explained 86%, 5%, and 5% of the total variation, respectively. Two arrays (LG2 and BG3) fell outside the 95% concentration ellipse and were excluded from downstream analysis.
