# Supplementary material
Source: PubMed Central journal article supplement (PMC2770020)
Supplement: supp_109.078139_biolreprod.109.078139-3.pdf [file supp_109.078139_biolreprod.109.078139-3.pdf]

Supplemental Table S2. Comparative Imprinting in Selected Mammalian Species.

| Gene Symbol<br>or<br>Transcriptional<br>Unit | Imprinting Status* |       |            |           |                |            | Expressed<br>Allele in<br>Swine | Evidence<br>of<br>Imprinting<br>in Swine      |
|----------------------------------------------|--------------------|-------|------------|-----------|----------------|------------|---------------------------------|-----------------------------------------------|
|                                              | Human              | Mouse | Cow        | Marsupial | Mono-<br>treme | Pig        |                                 |                                               |
| <i>AMPD3</i>                                 | NI                 | I     | NR         | NR        | NR             | I<br>(PD)  | M                               | Array                                         |
| <i>APEG3</i>                                 | PD                 | I     | PD         | NR        | NR             | I<br>(PD)  | P                               | Array                                         |
| <i>ASB4</i>                                  | NR                 | I     | NI<br>(PD) | NI        | NR             | NI         | Biallelic                       | QUASEP                                        |
| <i>ASCL2</i>                                 | CD                 | I     | NR         | NR        | NR             | NI<br>(PD) | Biallelic                       | Array                                         |
| <i>CALCR</i>                                 | PD                 | I     | NR         | NR        | NR             | NI         | Biallelic                       | QUASEP                                        |
| <i>CD81</i>                                  | NI                 | I     | NI<br>(PD) | NR        | NR             | NI         | Biallelic                       | Array,<br>QUASEP                              |
| <i>CDKN1C</i>                                | I                  | I     | NR         | NI        | NR             | I<br>(PD)  | M                               | Array                                         |
| <i>COMMD1</i>                                | NI                 | I     | NR         | NR        | NR             | NI<br>(PD) | Biallelic                       | Array                                         |
| <i>COPG2</i>                                 | CD                 | I     | NI         | NR        | NR             | I<br>(PD)  | M                               | Array                                         |
| <i>DCN</i>                                   | NI                 | PD    | NI         | NR        | NR             | NI         | M                               | Array,<br>QUASEP                              |
| <i>DHCR7</i>                                 | NI                 | I     | NR         | NR        | NR             | I<br>(PD)  | M                               | Array                                         |
| <i>DIRAS3</i>                                | PD                 | NO    | NR         | NR        | NR             | I          | P                               | Ref [2],<br>Array,<br>QUASEP                  |
| <i>DLK1</i>                                  | I                  | I     | NR         | NI        | I              | I          | P                               | Ref [3]<br>QUASEP                             |
| <i>DLX5</i>                                  | CD                 | CD    | NR         | NR        | NR             | CD         | M                               | Ref [4],<br>Array                             |
| <i>H13</i>                                   | NR                 | I     | NR         | NR        | NR             | NI<br>(PD) | Biallelic                       | Array                                         |
| <i>H19</i>                                   | I                  | I     | I          | I         | NR             | I          | M                               | Ref [6],<br>Array,<br>QUASEP                  |
| <i>HTR2A</i>                                 | NI/CD              | I     | NI<br>(PD) | NR        | NR             | NI         | Biallelic                       | QUASEP                                        |
| <i>IGF2</i>                                  | I                  | I     | I          | I         | NI             | I          | P                               | Ref [7]<br>Array,<br>QUASEP,<br>sq-RT-<br>PCR |
| <i>IGF2AS</i>                                | I                  | I     | NR         | NR        | NR             | I          | P                               | Ref [8],<br>Array,<br>QUASEP,                 |

|                 |    |    |    |    |    |        |  |     |                                   |
|-----------------|----|----|----|----|----|--------|--|-----|-----------------------------------|
|                 |    |    |    |    |    |        |  |     | sq-RT-PCR                         |
| <b>IGF2R</b>    | PI | I  | I  | I  | NI | I      |  | M   | Ref [9], Array                    |
| <b>INPP5F</b>   | I  | I  | NR | NR | NR | I/CD   |  | P   | QUASEP, sq-RT-PCR                 |
| <b>MEG3</b>     | I  | I  | I  | NO | NR | I      |  | M   | Ref [10], Array                   |
| <b>MEST</b>     | I  | I  | NR | I  | NR | I      |  | P   | Ref [11], Array, QUASEP           |
| <b>NAP1L5</b>   | I  | I  | I  | NR | NR | I      |  | P   | Array                             |
| <b>NDN</b>      | I  | I  | NR | NR | NR | I (PD) |  | P   | Array                             |
| <b>NNAT</b>     | I  | I  | I  | NR | NR | I      |  | P   | Ref [2], QUASEP                   |
| <b>OSBPL1A</b>  | I  | NR | NR | NR | NR | I (PD) |  | M   | Array                             |
| <b>PEG10</b>    | I  | I  | I  | I  | NO | I      |  | P   | Ref [12], Array, QUASEP           |
| <b>PEG3</b>     | I  | I  | I  | NR | NR | I (PD) |  | P   | Array, sq-RT-PCR                  |
| <b>PHLDA2</b>   | I  | I  | NR | NR | NR | PI     |  | M   | Array, QUASEP                     |
| <b>PLAGL1</b>   | I  | I  | NR | NR | NR | I      |  | P   | Ref [5], Array, QUASEP, sq-RT-PCR |
| <b>PON2</b>     | NR | PD | NR | NR | NR | I (PD) |  | M   | Array                             |
| <b>PPP1R9A</b>  | I  | I  | NR | NI | NR | I (PD) |  | M   | sq-RT-PCR                         |
| <b>PRIM2</b>    | I  | NR | NR | NR | NR | I (PD) |  | M   | Array                             |
| <b>SGCE</b>     | I  | I  | NR | NI | NR | I      |  | P   | Array, QUASEP, sq-RT-PCR          |
| <b>SLC22A3</b>  | PI | I  | NR | NR | NR | I (PD) |  | M   | Array                             |
| <b>SLC38A4</b>  | NR | I  | NI | NR | NR | I (PD) |  | M/P | Array, sq-RT-PCR                  |
| <b>SNORD107</b> | I  | I  | NR | NR | NR | I      |  | P   | Array, QUASEP                     |
| <b>SNRPN</b>    | I  | I  | NR | NR | NR | I (PD) |  | P   | Array, sq-RT-PCR                  |

| TFPI2     | PI | I                                                                                            | NR | NR | NR | I<br>(PD) | M | Array |
|-----------|----|----------------------------------------------------------------------------------------------|----|----|----|-----------|---|-------|
| I         | =  | imprinted                                                                                    |    |    |    |           |   |       |
| NI        | =  | not imprinted                                                                                |    |    |    |           |   |       |
| CD        | =  | conflicting data                                                                             |    |    |    |           |   |       |
| PD        | =  | provisional data                                                                             |    |    |    |           |   |       |
| PI        | =  | polymorphic imprinting/ tissue-specific imprinting                                           |    |    |    |           |   |       |
| NR        | =  | no reports of imprinting status                                                              |    |    |    |           |   |       |
| M         | =  | maternal allele                                                                              |    |    |    |           |   |       |
| P         | =  | paternal allele                                                                              |    |    |    |           |   |       |
| Array     | =  | microarray expression profiling                                                              |    |    |    |           |   |       |
| sq-RT-PCR | =  | semi-quantitative reverse-transcription PCR of biparental versus parthenogenic fetal tissues |    |    |    |           |   |       |
| Ref       | =  | references                                                                                   |    |    |    |           |   |       |

\*Data to construct this table for comparative mammalian imprinting status was retrieved from Morison et al 2005 [1].

1. Morison IM, Ramsay JP, Spencer HG. A census of mammalian imprinting. *Trends Genet* 2005; 21: 457-465.
2. Cheng HC, Zhang FW, Deng CY, Jiang CD, Xiong YZ, Li FE, Lei MG. *NNAT* and *DIRAS3* genes are paternally expressed in pigs. *Genet Sel Evol* 2007; 39: 599-607.
3. Kim KS, Kim JJ, Dekkers JC, Rothschild MF. Polar overdominant inheritance of a *DLK1* polymorphism is associated with growth and fatness in pigs. *Mamm Genome* 2004; 15: 552-559.
4. Cheng HC, Zhang FW, Jiang CD, Li FE, Xiong YZ, Deng CY. Isolation and imprinting analysis of the porcine *DLX5* gene and its association with carcass traits. *Anim Genet* 2008; 39: 395-399.
5. Zhang FW, Cheng HC, Jiang CD, Deng CY, Xiong YZ, Li FE, Lei MG. Imprinted status of pleomorphic adenoma gene-like I and paternal expression gene 10 genes in pigs. *J Anim Sci* 2007; 85: 886-890.
6. Li C, Bin Y, Curchoe C, Yang L, Feng D, Jiang Q, O'Neill M, Tian XC, Zhang S. Genetic imprinting of *H19* and *IGF2* in domestic pigs (*Sus scrofa*). *Anim Biotechnol* 2008; 19: 22-27.
7. Nezer C, Moreau L, Brouwers B, Coppieters W, Dettloux J, Hanset R, Karim L, Kvasz A, Leroy P, Georges M. An imprinted QTL with major effect on muscle mass and fat deposition maps to the *IGF2* locus in pigs. *Nat Genet* 1999; 21: 155-156.
8. Braunschweig MH, Van Laere AS, Buys N, Andersson L, Andersson G. *IGF2* antisense transcript expression in porcine postnatal muscle is affected by a quantitative trait nucleotide in intron 3. *Genomics* 2004; 84: 1021-1029.
9. Killian JK, Nolan CM, Wylie AA, Li T, Vu TH, Hoffman AR, Jirtle RL. Divergent evolution in *M6P/IGF2R* imprinting from the Jurassic to the Quaternary. *Hum Mol Genet* 2001; 10: 1721-1728.

10. Li XP, Do KT, Kim JJ, Huang J, Zhao SH, Lee Y, Rothschild MF, Lee CK, Kim KS. Molecular characteristics of the porcine *DLK1* and *MEG3* genes. *Anim Genet* 2008; 39: 189-192.
11. Xu C, Su L, Zhou Q, Li C, Zhao S. Imprinting analysis of the porcine *MEST* gene in 75 and 90 day placentas and prenatal tissues. *Acta Biochim Biophys Sin (Shanghai)* 2007; 39: 633-639.
12. Zhou QY, Huang JN, Xiong YZ, Zhao SH. Imprinting analyses of the porcine *GATM* and *PEG10* genes in placentas on days 75 and 90 of gestation. *Genes Genet Syst* 2007; 82: 265-269.
